# Supplementary material for: Morphologies of Comb-like Polyacrylic Acid/Polyacrylate Copolymers as Functions of the Degree of Derivatization with n-C22H45 Side Chains
Source: MDPI journal article supplement (doi:10.3390/polym15244663), 2023-12-11
Supplement: s1 [file s1]

# Morphologies of Comb-like Polyacrylic Acid/Polyacrylate Copolymers as Functions of the Degree of Derivatization with $n\text{-C}_{22}\text{H}_{45}$ Side Chains

Tomoya Okada <sup>1</sup>, Mizuho Ishii <sup>1</sup>, Harumi Sato <sup>2</sup> and Go Matsuba <sup>1,\*</sup>

<sup>1</sup> Graduate School of Organic Materials Engineering, Yamagata University, 4-3-16 Jonan, Yonezawa 992-8510, Yamagata, Japan

<sup>2</sup> Graduate School of Human Development and Environment, Kobe University, Kobe 657-8501, Hyogo, Japan; hsato@tiger.kobe-u.ac.jp

\* Correspondence: gmatsuba@yz.yamagata-u.ac.jp

## Definition of $T_m$ and $T_c$

Figure S1 shows the DSC thermograms of 55 wt.% sample of the heating rate of 10 °C/min. In this manuscript, we defined  $T_m$  and  $T_x$  as the onset temperature of melting and crystallization. We evaluated the peak temperature and the finishing ones in Figure S1. Table S1 shows various  $T_m$  and  $T_x$ .

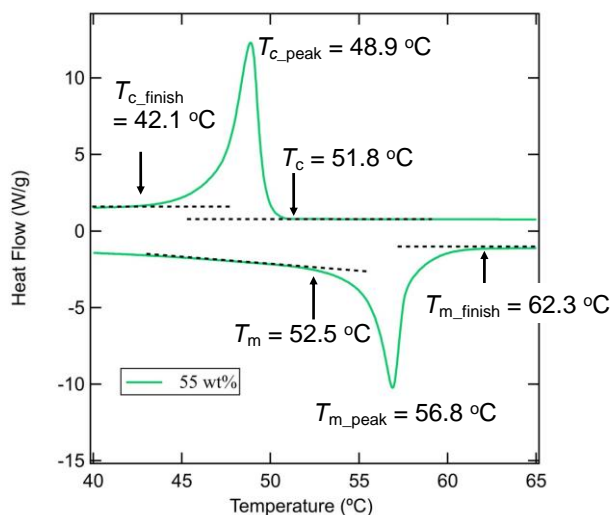

**Figure S1.**  $T_m$  and  $T_x$  definition from DSC thermograms of 55 wt.% sample.

**Table S1.** List of  $T_m$  and  $T_x$ , the peak temperature and the finishing temperature during melting and crystallization processes.

| Sample [°C] | $T_m$ | $T_{m\_peak}$ | $T_{m\_finish}$ | $T_x$ | $T_{x\_peak}$ | $T_{x\_finish}$ |
|-------------|-------|---------------|-----------------|-------|---------------|-----------------|
| 20 wt%      | 32.6  | 44.2          | 48.9            | 31.7  | 24.6          | 17.1            |
| 30 wt%      | 40.7  | 47.5          | 52.3            | 39.2  | 33.2          | 25.7            |
| 45 wt%      | 47.5  | 53.5          | 57.9            | 46.2  | 42.8          | 35.6            |
| 55 wt%      | 53.3  | 56.8          | 62.3            | 51.8  | 48.9          | 42.1            |
| 70 wt%      | 57.1  | 59.7          | 68.0            | 56.6  | 51.5          | 42.8            |
| 90 wt%      | 60.2  | 63.9          | 71.8            | 59.2  | 56.4          | 44.5            |
| 100 wt%     | 61.2  | 66.5          | 75.4            | 61.0  | 57.7          | 45.2            |

### WAXS profiles below $T_m$

We focused on crystallinity at 0 °C for the different crystallizable side-chain component. In Figure S2, the crystal diffraction peak was observed at  $15.3 \text{ nm}^{-1}$  in the case of >20 wt.%, while we could observe no crystal diffraction peak of 0 wt.% because of no crystallizable components.

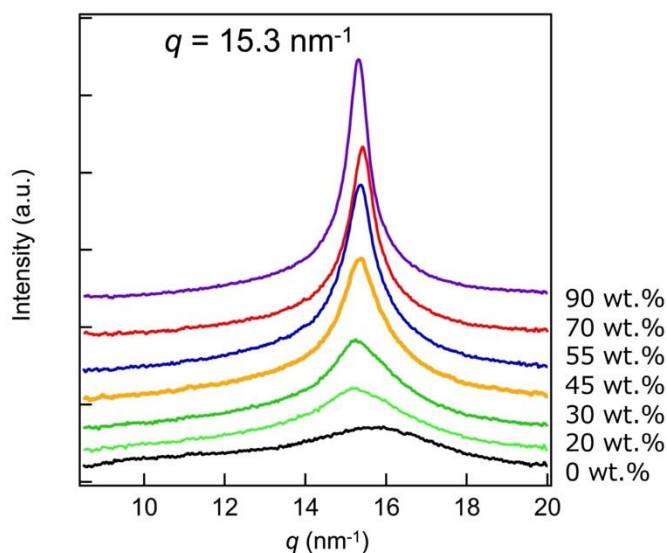

**Figure S2.** WAXS profiles of different crystallizable side-chain component at 0 °C.

### Peak decomposition of WAXS profiles

Figure S3 shows the peak decomposition of WAXS profile of 70 wt.% at 0 °C. The peak at  $15.4 \text{ nm}^{-1}$  is assigned as the diffraction from crystalline, and the broad peak is due to amorphous halo.

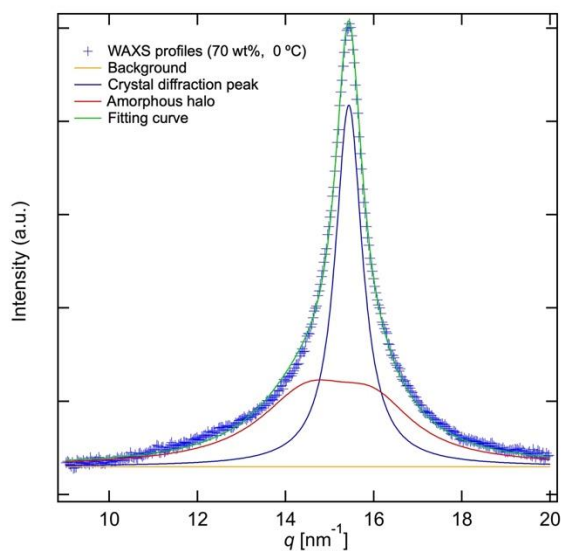

**Figure S3.** WAXS profiles of 70 wt.% at 0 °C (blue cross). The background, crystal diffraction peak, and amorphous halo are orange, purple, and red lines, respectively. The fitting curve is green line.

### Low frequency Raman spectra of 100 wt.% sample

We focused on 100 wt.% crystallizable component sample of crystal structure. The enthalpy of crystal melting of the 100 wt.% crystallizable component sample was  $\sim 117.2$  J/g ( $=36.4$  kJ/mol) in Figure 2a. Because the enthalpy of crystal melting of 1-docosane was  $158.4$  J/g ( $=49.0$  kJ/mol) based on the published data [S1], the crystallinity was estimated to be 74%. These findings imply that the entire side-chain component could not be crystallized even in 100 wt.% sample. From SAXS measurements, the crystal thickness is evaluated to be  $\sim 1.96$  nm in a 100 wt.% case. The correlation length crystal alkane chain would be composed of  $C_{15.4}$ .

Furthermore, Figure S4 shows the Raman spectra of 100 wt.% sample during heating up. The peak of the Raman shift was observed at  $160\text{ cm}^{-1}$ . This result suggests that the longitudinal acoustic mode (LAM), “accordion”, vibration of *n*-alkyl side chains. The Raman shift is consistent between  $C_{15}$  and  $C_{16}$  [S2]. The peak disappears at  $80^\circ\text{C}$  above  $T_m$ .

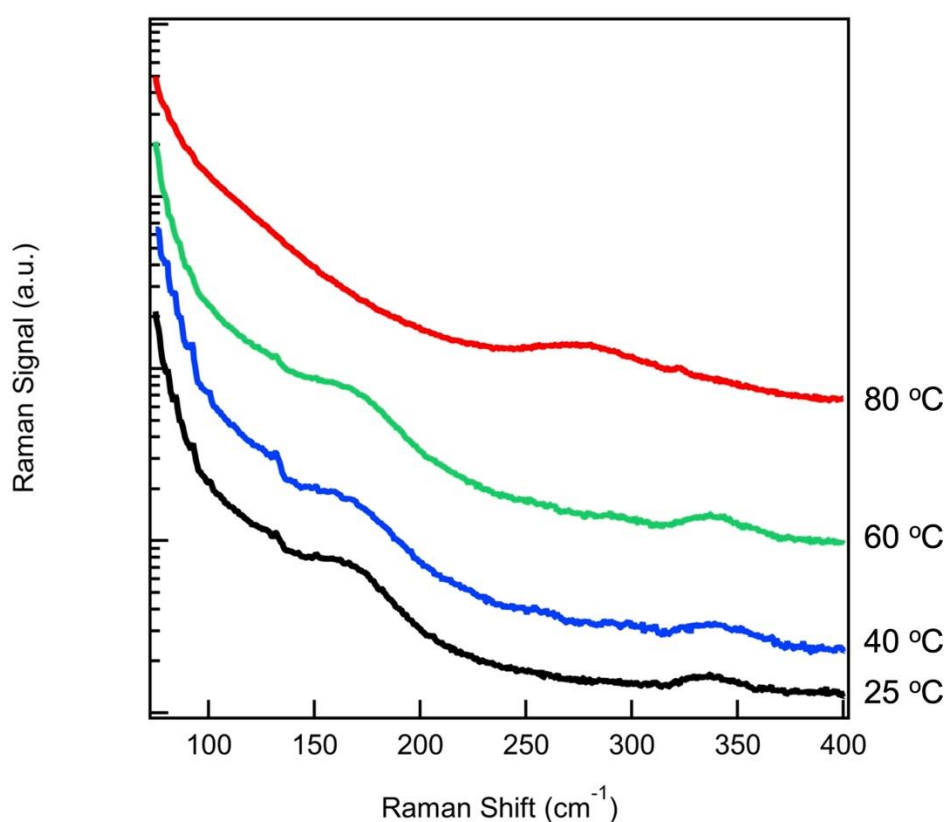

**Figure S4.** Raman spectra of 100 wt.% crystallizable side-chain sample during heating up.

#### References:

- [S1] P. Claudy, J.M. Letoffe, Phase transitions in even *n*-alkanes  $C_nH_{2n+2}$ ,  $n = 16-28$ . Characterization by differential calorimetric analysis and by thermo-optical analysis. Effect of deuteration. *Calorim. Anal. Therm.*, **1991**, 22, 281.
- [S2] R. F. Schaufele, Chain Shortening in Polymethylene Liquids, *J. Chem. Phys.*, **1968**, 49, 4168.
